# Supplementary material
Source: MDPI journal article supplement (https://www.mdpi.com/2311-5637/8/1/10)
Supplement: s1 [file s1 › fermentation-1514529-supplementary.pdf]

**Table S1.** Alpha diversity of the bacterial microbiota of direct-cut and wilted guinea grass silage stored at 25°C and 40°C for 3 days, 1 month, and 2 months.

|               |          | Direct-cut silage |          | Wilted silage |          |
|---------------|----------|-------------------|----------|---------------|----------|
|               |          | Observed OTUs     | Faith PD | Observed OTUs | Faith PD |
| 25°C          | 3 days   | 56.0 b            | 5.82     | 91.5          | 9.89     |
|               | 1 month  | 81.5 a            | 7.01     | 54.0          | 6.65     |
|               | 2 months | 73.0 ab           | 6.51     | 59.5          | 7.58     |
|               | SE       | 5.42              | 0.27     | 8.73          | 1.00     |
| 40°C          | 3 days   | 63.5 x            | 7.33 x   | 67.5          | 8.20 x   |
|               | 1 month  | 47.5 y            | 4.94 y   | 59.0          | 5.97 y   |
|               | 2 months | 73.5 x            | 7.26 x   | 68.0          | 7.75 xy  |
|               | SE       | 2.63              | 0.23     | 4.63          | 0.43     |
| Two-way ANOVA |          |                   |          |               |          |
|               | T        | <0.05             | <0.05    | <0.05         | <0.05    |
|               | P        | <0.05             | 0.767    | 0.562         | 0.290    |
|               | T×P      | <0.01             | <0.01    | 0.110         | 0.522    |

OTUs, operational taxonomic units; PD, phylogenetic diversity; SE, Pooled standard error; T, storage temperature; P, storage period. Values in the same column with different following letters (a–b, x–y) are significantly different. Because the interaction was observed for several items, one-way analysis of variance was performed for the storage at 25°C and 40°C separately.

**Table S2.** Alpha diversity of the fungal microbiota of direct-cut and wilted guinea grass silage stored at 25°C and 40°C for 3 days, 1 month, and 2 months.

|               |          | Direct-cut silage |          | Wilted silage |          |
|---------------|----------|-------------------|----------|---------------|----------|
|               |          | Observed OTUs     | Faith PD | Observed OTUs | Faith PD |
| 25°C          | 3 days   | 46.5 a            | 13.5     | 45.5          | 14.6     |
|               | 1 month  | 38.0 b            | 13.4     | 24.0          | 10.3     |
|               | 2 months | 34.0 b            | 14.0     | 27.0          | 11.4     |
|               | SE       | 1.55              | 1.81     | 7.77          | 3.13     |
| 40°C          | 3 days   | 63.0 x            | 18.3     | 43.0 z        | 14.5 z   |
|               | 1 month  | 47.5 xy           | 15.3     | 70.0 y        | 19.6 y   |
|               | 2 months | 44.0 y            | 15.9     | 83.0 x        | 24.1 x   |
|               | SE       | 3.62              | 0.97     | 2.52          | 0.35     |
| Two-way ANOVA |          |                   |          |               |          |
|               | T        | <0.01             | 0.589    | 0.234         | 0.372    |
|               | P        | <0.01             | 0.053    | <0.01         | <0.01    |
|               | T×P      | 0.427             | 0.555    | <0.01         | 0.065    |

OTUs, operational taxonomic units; PD, phylogenetic diversity; SE, Pooled standard error; T, storage temperature; P, storage period. Values in the same column with different following letters (a–b, x–z) are significantly different. Because the interaction was observed for one item, one-way analysis of variance was performed for the storage at 25°C and 40°C separately.
